# Supplementary material for: qNMR in natural products: practical approaches. What nobody tells you before starting your qNMR study!
Source: Frontiers journal article supplement (doi:10.3389/fntpr.2024.1416195), 2024-06-25
Supplement: Data_Sheet_1.pdf [file Data_Sheet_1.pdf]

## *Supplementary Material*

### **qNMR in Natural Products: Practical Approaches.**

#### **What Nobody Tells You Before Starting Your qNMR Study!**

Luciana Marçal Ravaglia<sup>1</sup>, Paola Dias de Oliveira<sup>1</sup>, Ulrike Holzgrabe<sup>2</sup>, Glaucia Braz Alcantara<sup>1\*</sup>

<sup>1</sup>Institute of Chemistry, Federal University of Mato Grosso do Sul (UFMS), CP 549, zip code 79074-460, Campo Grande/MS, Brazil

<sup>2</sup> Institute of Pharmacy and Food Chemistry, University of Würzburg, Am Hubland, 97074 Würzburg, German

#### **\* Correspondence:**

Corresponding Author

glaucia.alcantara@ufms.br

Table S1: List of abbreviations and equivalence of terms related to different NMR spectrometers.

| Definition                 | Universal<br>abbreviation | Bruker                 | Varian/Agilent | qOne/Jeol |
|----------------------------|---------------------------|------------------------|----------------|-----------|
| relaxation delay           |                           | D1                     | d1             | d1        |
| acquisition time           |                           | AQ                     | aq             | acqtime   |
| longitudinal<br>relaxation | T1                        | -                      | -              | -         |
| ERETIC2                    | -                         | It is an<br>electronic | -              | -         |

Supplementary Material

|                                  |      |                                                                                                                   |      |                       |
|----------------------------------|------|-------------------------------------------------------------------------------------------------------------------|------|-----------------------|
|                                  |      | calibration that acts as an external standard method applying the pulse length–based concentration determination. |      |                       |
| number of points acquired        | -    | TD                                                                                                                | np   | np                    |
| data size of real spectrum       | -    | SI                                                                                                                | fn   | si                    |
| line broadening adjustment value | -    | LB                                                                                                                | lb   | lb                    |
| number of scans (transients)     | -    | NS                                                                                                                | nt   | ns                    |
| receiver gain                    | -    | RG                                                                                                                | gain | gain                  |
| signal-to-noise ratio            | S/N  | -                                                                                                                 | -    | -                     |
| full-width at half-height        | FWHM | -                                                                                                                 | -    | -                     |
| spectral width                   | -    | SW                                                                                                                | sw   | sw (ppm)<br>swhz (hz) |
| transmitter offset (center of    | -    | O1                                                                                                                | tof  | frqo (ppm)            |

|                                                              |       |          |      |                                                                     |
|--------------------------------------------------------------|-------|----------|------|---------------------------------------------------------------------|
| the spectral<br>width)                                       |       |          |      | frqohz (hz)                                                         |
| automatic <sup>1</sup> H<br>pulse calibration                | -     | pulsecal | -    | Calibration<br>sequences are<br>protocols not<br>single<br>commands |
| pulse width                                                  | -     | P1       | pw90 | p1                                                                  |
| Heteronuclear<br>single quantum<br>coherence<br>spectroscopy | HSQC  | -        | -    | -                                                                   |
| Total<br>Correlation<br>Spectroscopy                         | TOCSY | -        | -    | -                                                                   |
| Homonuclear J-<br>resolved<br>Spectroscopy                   | Jres  | -        | -    | -                                                                   |

---
